# Supplementary material for: Co-delivery of proapoptotic peptide and p53 DNA by reduction-sensitive polypeptides for cancer therapy
Source: Royal Society of Chemistry journal article supplement (doi:10.1039/c5bm00046g), 2015-01-01
Supplement: c5bm00046g1.pdf [file c5bm00046g1.pdf]

**Electronic Supplementary Information**

*of*

**Co-delivery of proapoptosis peptide and p53 DNA by reduction-sensitive  
polypeptides for cancer therapy**

Si Chen, Lei Rong, Hui-Zhen Jia, Si-Yong Qin, Xuan Zeng, Ren-Xi Zhuo, Xian-

Zheng Zhang\* □

---

*Key Laboratory of Biomedical Polymers of Ministry of Education & Department of Chemistry,  
Wuhan University, Wuhan 430072, PR China.*

*E-mail address: xz-zhang@whu.edu.cn (X. Z. Zhang); Tel. & Fax: 86-27-68754509.*

**Fig. S1.** The CD spectra of xPolyR<sub>8</sub>, KLA(TPP) and xPolyR<sub>8</sub>-KLA(TPP). The positive bands near 208 nm and 220 nm were indicative of  $\alpha$ -helical conformation of KLA(TPP) and xPolyR<sub>8</sub>-KLA(TPP)

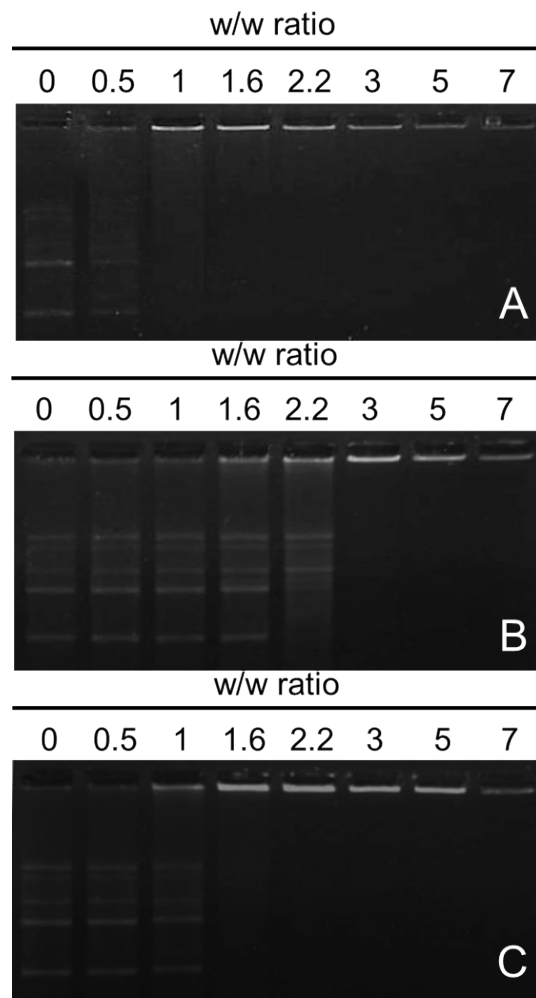

**Fig. S2** Agarose gel electrophoresis retardation assay of (A) xPolyR<sub>8</sub>/pGL-3 complex, (B) C-KLA(TPP)/pGL-3 complex and (C) xPolyR<sub>8</sub>-KLA(TPP)/pGL-3 complex at different w/w ratios.

**Fig. S3** Particle size of vector/pGL-3 complexes at w/w ratios ranging from 5 to 40 (A) and zeta potential of vector/pGL-3 complexes at w/w ratios ranging from 5 to 40 (B).

Data are shown as the mean  $\pm$  SD (n = 3).

**Fig. S4** TEM images of vector/pGL-3 complexes at w/w ratio of 20. A: xPolyR<sub>8</sub>/pGL-3 complex; B: KLA(TPP)/pGL-3 complex; and C: xPolyR<sub>8</sub>-KLA(TPP)/pGL-3 complex.

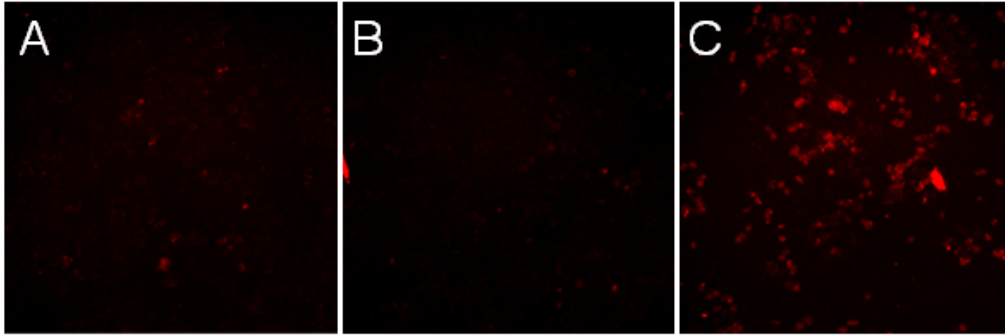

**Fig. S5** The transfection of p53 mediated by vector/p53 complexes at w/w ratio of 20.

(A) xPolyR<sub>8</sub>; (B) C-KLA(TPP); and (C) xPolyR<sub>8</sub>-KLA(TPP).
